# Supplementary material
Source: MDPI journal article supplement (https://www.mdpi.com/2071-1050/16/9/3672)
Supplement: s1 [file s1]

## SUPPLEMENTARY MATERIALS FOR

### “TEMPORAL VARIABILITY OF A NATURAL GRASSLAND IN THE BRAZILIAN PAMPA BIOME ACTING AS A CO<sub>2</sub> SINK”

Débora Regina Roberti <sup>1,\*</sup>, Alecsander Mergen <sup>1</sup>, Ricardo Acosta Gotuzzo <sup>2</sup>, Gustavo Pujol Veeck <sup>1</sup>, Tiago Bremm <sup>1</sup>, Luciana Marin <sup>3</sup>, Fernando Luiz Ferreira de Quadros <sup>3,†</sup>  
and Rodrigo Josemar Seminoti Jacques <sup>4</sup>

<sup>1</sup>Departamento de Física, Universidade Federal de Santa Maria (UFSM), Santa Maria, RS, Brazil

<sup>2</sup>Instituto de Oceanografia, Universidade Federal do Rio Grande (FURG), Rio Grande, RS, Brazil

<sup>3</sup>Departamento de Zootecnia, Universidade Federal de Santa Maria (UFSM), Santa Maria, RS, Brazil

<sup>4</sup>Departamento de Solos, Universidade Federal de Santa Maria (UFSM), Santa Maria, RS, Brazil

<sup>†</sup> *in memoriam*

\* Corresponding author: debora@ufsm.br

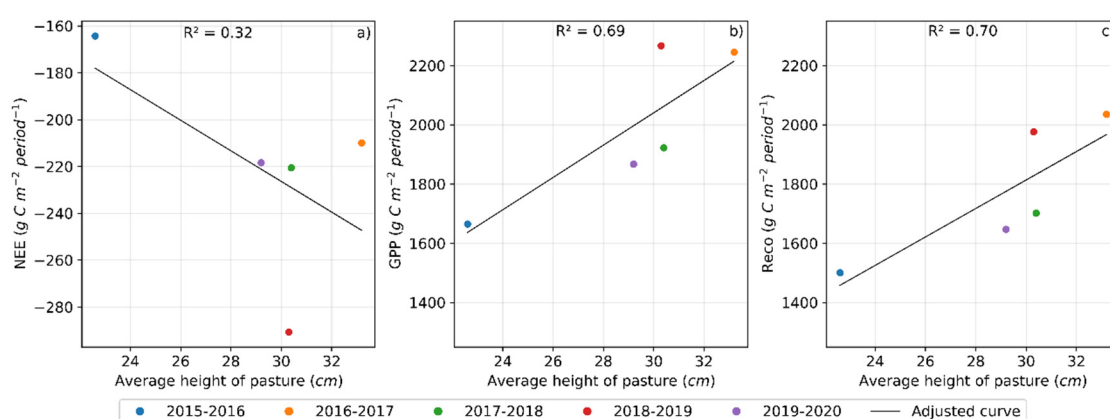

**Figure S1.** Relationship between pasture height and net ecosystem exchange (NEE) (a), gross primary productivity (GPP) (b), and total ecosystem respiration (Reco) (c) during warm season periods in a natural pasture of the Brazilian Pampa biome grazed by cattle.

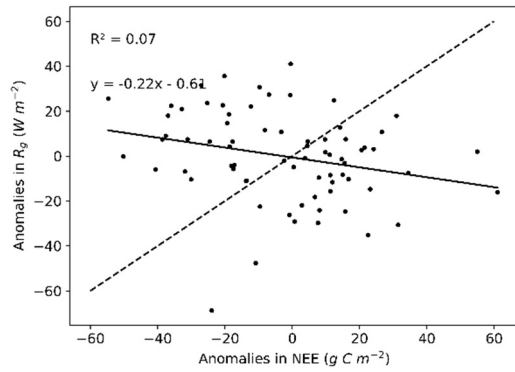

(a)

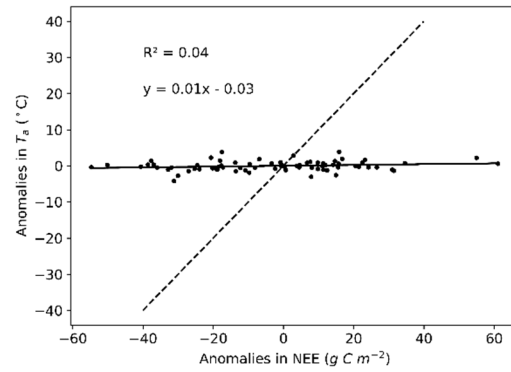

(b)

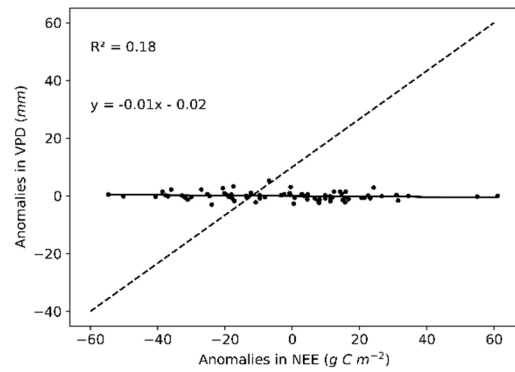

(c)

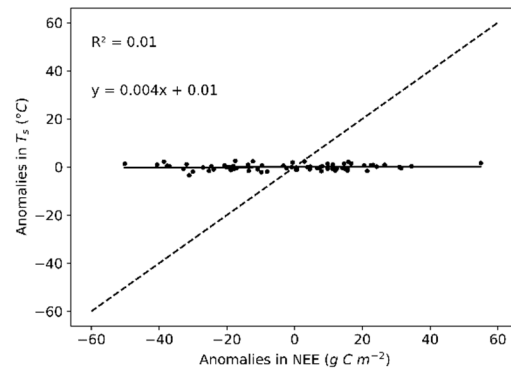

(d)

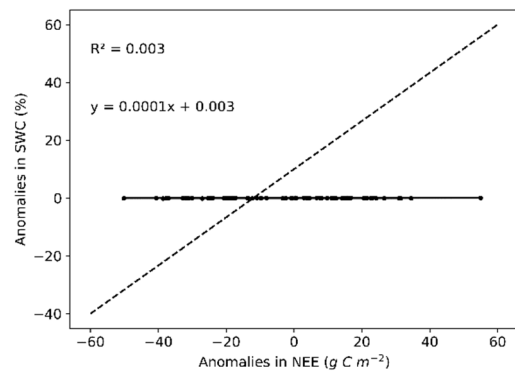

(e)

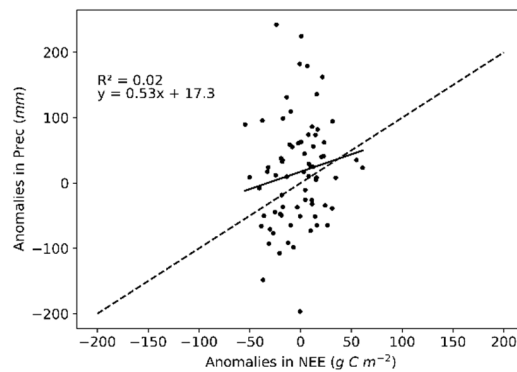

(f)

**Figure S2** – Correlation between anomalies in monthly NEE and anomalies in monthly: incoming solar radiation ( $R_g$ ) (a), air temperature ( $T_a$ ) (b), vapor pressure deficit (VPD) (c), soil temperature at 0.05 m ( $T_s$ ) (d), volumetric soil water content (SWC) (e), and precipitation (Prec) (f), in a natural pasture of the Brazilian Pampa biome grazed by cattle.

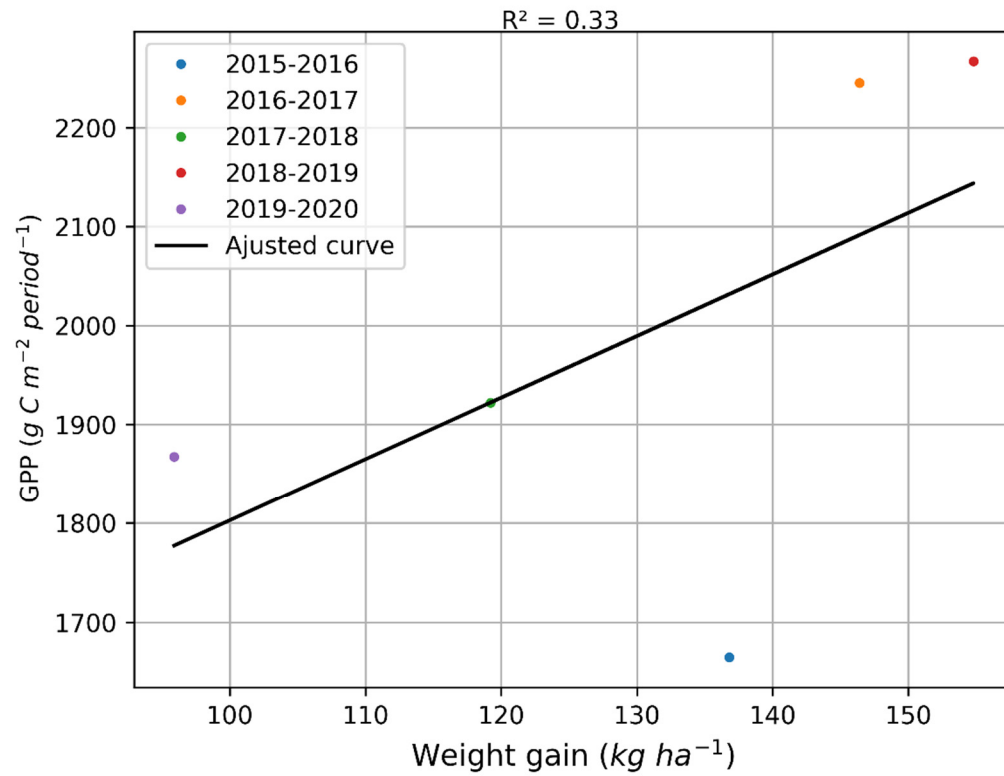

**Figure S3.** Annual correlation between gross primary productivity (GPP) and weight gain of cattle in the warm season in a natural pasture of the Brazilian Pampa biome in the warm season periods.
